# Supplementary material
Source: MDPI journal article supplement (https://www.mdpi.com/2311-5629/4/3/48)
Supplement: s1 [file s1]

## Supporting information

Table S1 Particle size for CNFs based catalysts

| Catalyst         | Mean size | Standard deviation |
|------------------|-----------|--------------------|
| Au/PS-CNF        | 3.6       | 0.5                |
| Pt/PS-CNF        | 3.5       | 0.7                |
| Au-Pt/PS-CNF     | 5.6       | 1.1                |
| Au-Pt/LHT-CNF    | 4.9       | 0.9                |
| Au-Pt/ HHT-CNF   | 4.5       | 0.7                |
| Au-Pt/P- PS-CNF  | 5.2       | 0.9                |
| Au-Pt/P- LHT-CNF | 4.3       | 0.3                |
| Au-Pt/P- HHT-CNF | 3.9       | 0.3                |

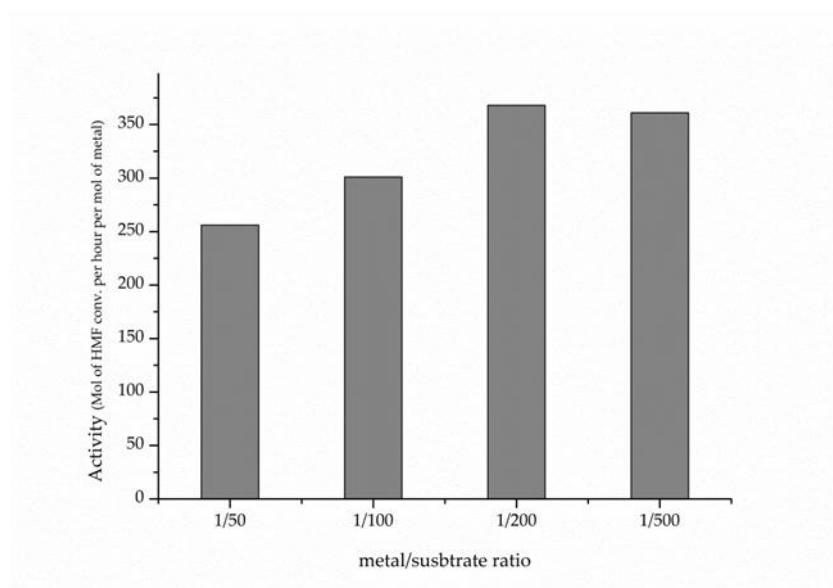

Figure S1 Effect of Metal/substrate ratio using Au-Pt/P-HHT-CNF

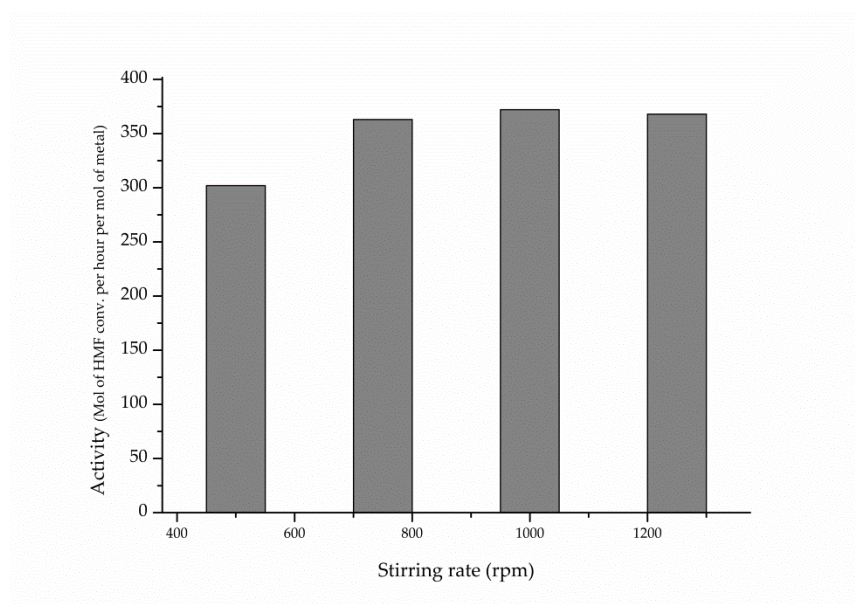

Figure S2 Effect of stirring rate using Au-Pt/P-HHT-CNF
